# Supplementary material
Source: PubMed Central journal article supplement (PMC5256406)
Supplement: bmjqs-2016-005257supp_tables.pdf [file bmjqs-2016-005257supp_tables.pdf]

**Supplementary Table S1.** Joint impact of daily volume and weekend delivery (model 2) on perinatal outcomes, controlling for operative vaginal delivery (both failed and successful) and cesarean delivery

|                                        | <b>Outcome</b>             | <b>Low/average-volume weekday</b> | <b>High-volume weekday</b> | <b>Low/average-volume weekend</b> | <b>High-volume weekend</b> |
|----------------------------------------|----------------------------|-----------------------------------|----------------------------|-----------------------------------|----------------------------|
| <b>Model 2<br/>(Interaction model)</b> | <i>Maternal</i>            |                                   |                            |                                   |                            |
|                                        | Obstetric infection        | Ref.                              | 0.98 (0.94, 1.03)          | <b>1.11 (1.07, 1.16)</b>          | <b>1.33 (1.19, 1.48)</b>   |
|                                        | Hemorrhage                 | Ref.                              | <b>0.95 (0.91, 0.98)</b>   | 1.03 (1.00, 1.07)                 | <b>1.13 (1.02, 1.25)</b>   |
|                                        | Severe perineal laceration | Ref.                              | 0.98 (0.94, 1.02)          | 1.03 (0.99, 1.08)                 | 0.95 (0.85, 1.06)          |
|                                        | Prolonged LOS <sup>a</sup> | Ref.                              | 1.03 (0.99, 1.07)          | <b>1.20 (1.16, 1.24)</b>          | <b>1.40 (1.29, 1.51)</b>   |
|                                        | Composite maternal         | Ref.                              | 0.99 (0.96, 1.01)          | <b>1.11 (1.09, 1.14)</b>          | <b>1.21 (1.15, 1.29)</b>   |
|                                        | <i>Neonatal</i>            |                                   |                            |                                   |                            |
|                                        | Birth trauma               | Ref.                              | 0.99 (0.95, 1.04)          | 0.98 (0.94, 1.02)                 | 0.98 (0.89, 1.07)          |
|                                        | Neonatal seizures          | Ref.                              | <b>1.33 (1.01, 1.74)</b>   | 1.16 (0.86, 1.56)                 | 1.08 (0.65, 1.79)          |
|                                        | Apgar score <7             | Ref.                              | 1.02 (0.94, 1.10)          | <b>1.15 (1.06, 1.24)</b>          | <b>1.34 (1.14, 1.57)</b>   |
|                                        | NICU admission             | Ref.                              | 0.98 (0.93, 1.03)          | <b>1.10 (1.05, 1.14)</b>          | <b>1.15 (1.05, 1.26)</b>   |
|                                        | Neonatal death             | Ref.                              | 0.91 (0.78, 1.07)          | 1.03 (0.89, 1.20)                 | 0.73 (0.47, 1.13)          |
|                                        | Composite infant           | Ref.                              | 0.98 (0.95, 1.02)          | <b>1.04 (1.01, 1.07)</b>          | <b>1.08 (1.01, 1.16)</b>   |

**Bold** indicates significance at  $P < 0.05$ .

a. Prolonged LOS defined as LOS >3 days for vaginal deliveries and >5 days for cesarean deliveries

**Supplementary Table S2.** Joint impact of daily volume and weekend delivery (model 2) on perinatal outcomes, using admission day rather than delivery day as the index day to define “busy days” and weekends.

|                                    | <b>Outcome</b>             | <b>Low/average-volume weekday</b> | <b>High-volume weekday</b> | <b>Low/average-volume weekend</b> | <b>High-volume weekend</b> |
|------------------------------------|----------------------------|-----------------------------------|----------------------------|-----------------------------------|----------------------------|
| <b>Model 2 (Interaction model)</b> | <i>Maternal</i>            |                                   |                            |                                   |                            |
|                                    | Obstetric infection        | Ref.                              | <b>0.95 (0.91, 0.99)</b>   | 1.01 (0.98, 1.06)                 | <b>1.22 (1.09, 1.36)</b>   |
|                                    | Hemorrhage                 | Ref.                              | 0.98 (0.94, 1.02)          | 0.99 (0.95, 1.02)                 | <b>1.16 (1.03, 1.29)</b>   |
|                                    | Severe perineal laceration | Ref.                              | 0.99 (0.95, 1.03)          | <b>1.08 (1.04, 1.13)</b>          | 1.05 (0.95, 1.16)          |
|                                    | Prolonged LOS <sup>a</sup> | Ref.                              | <b>1.05 (1.00, 1.09)</b>   | <b>0.76 (0.72, 0.80)</b>          | <b>0.78 (0.68, 0.89)</b>   |
|                                    | Composite maternal         | Ref.                              | 0.99 (0.96, 1.01)          | <b>0.96 (0.94, 0.99)</b>          | 1.07 (0.99, 1.15)          |
|                                    | <i>Neonatal</i>            |                                   |                            |                                   |                            |
|                                    | Birth trauma               | Ref.                              | 1.00 (0.96, 1.04)          | 0.99 (0.96, 1.03)                 | 0.97 (0.87, 1.09)          |
|                                    | Neonatal seizures          | Ref.                              | 1.03 (0.80, 1.31)          | 0.96 (0.70, 1.31)                 | <b>1.88 (1.18, 2.99)</b>   |
|                                    | Apgar score <7             | Ref.                              | 1.01 (0.94, 1.08)          | 1.04 (0.96, 1.12)                 | 1.06 (0.87, 1.30)          |
|                                    | NICU admission             | Ref.                              | 1.01 (0.97, 1.06)          | <b>1.04 (1.01, 1.07)</b>          | 0.97 (0.88, 1.08)          |
|                                    | Neonatal death             | Ref.                              | 1.03 (0.87, 1.21)          | 1.13 (0.94, 1.35)                 | 1.02 (0.64, 1.62)          |
|                                    | Composite infant           | Ref.                              | 1.01 (0.97, 1.04)          | 1.01 (0.99, 1.04)                 | 0.97 (0.90, 1.04)          |

**Bold** indicates significance at P<0.05.

a. Prolonged LOS defined as LOS >3 days for vaginal deliveries and >5 days for cesarean deliveries
